# Supplementary material for: Fine-tuning of polariton energies in a tailored plasmon cavity and J-aggregates hybrid system
Source: Royal Society of Chemistry journal article supplement (doi:10.1039/d0nr06376b), 2020-01-01
Supplement: d0nr06376b1.pdf [file d0nr06376b1.pdf]

**Supplemental Material for “Fine-tuning of polariton energies in  
tailored plasmon cavities and J-aggregates hybrid system”**

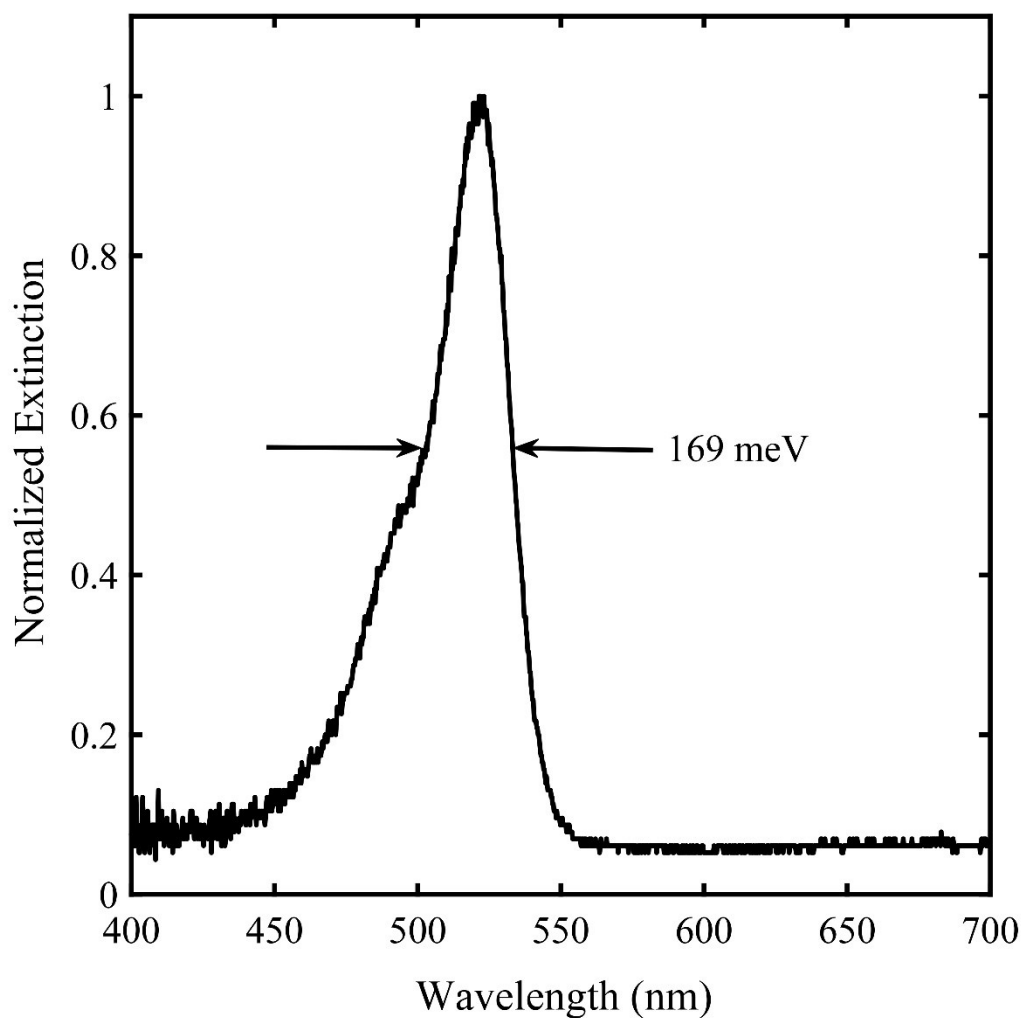

**Figure S1.** Absorption spectrum of TDBC monomer. Corresponding dye concentration is 0.03  $\mu\text{M}$ . TDBC monomers possess a broad absorption band at 522 nm, and the linewidth reached as high as 170 meV.

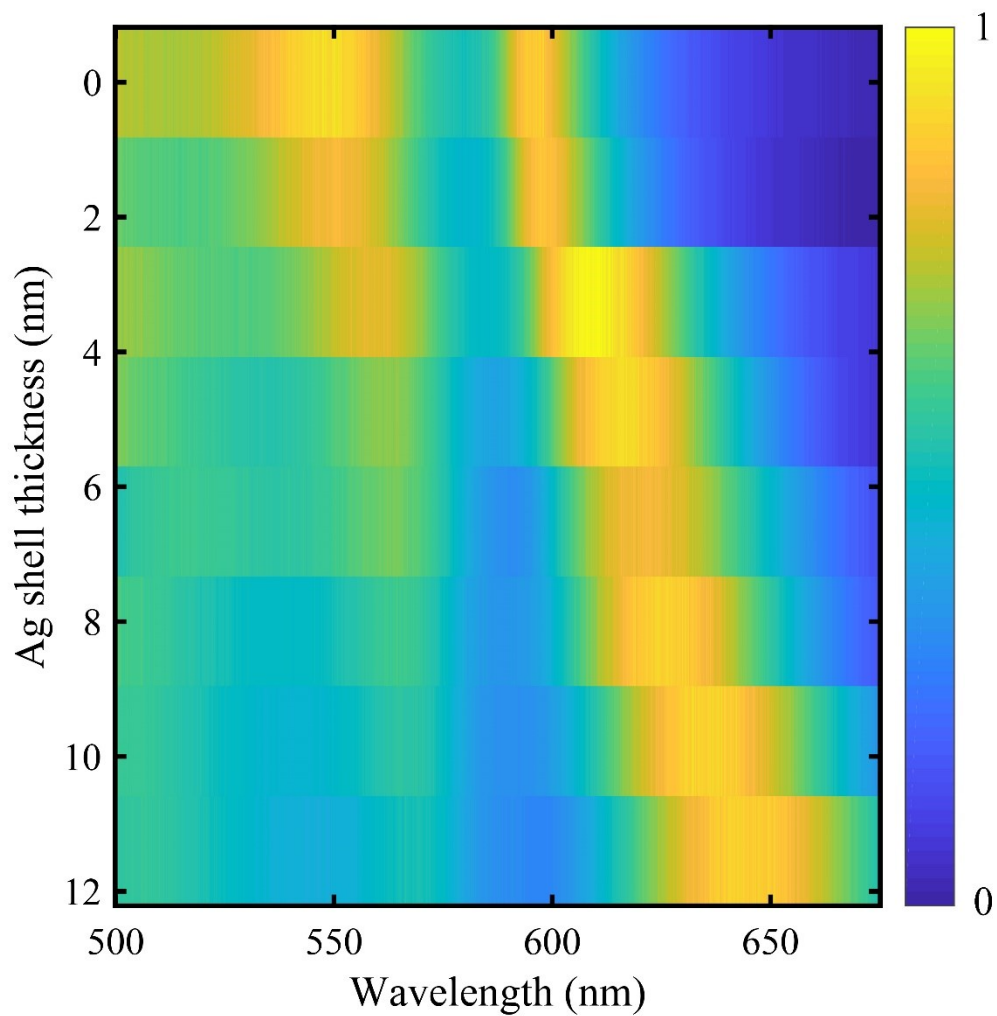

**Figure S2.** Experimental structure tuning results. The UPB is tuned with an accuracy of 2.5 nm (10.3 meV) in a range of 17.6 nm (328.8 meV). The LPB is tuned with an accuracy of 6.4 nm (20.5 meV) in a range of 44.7 nm (143.3 meV).

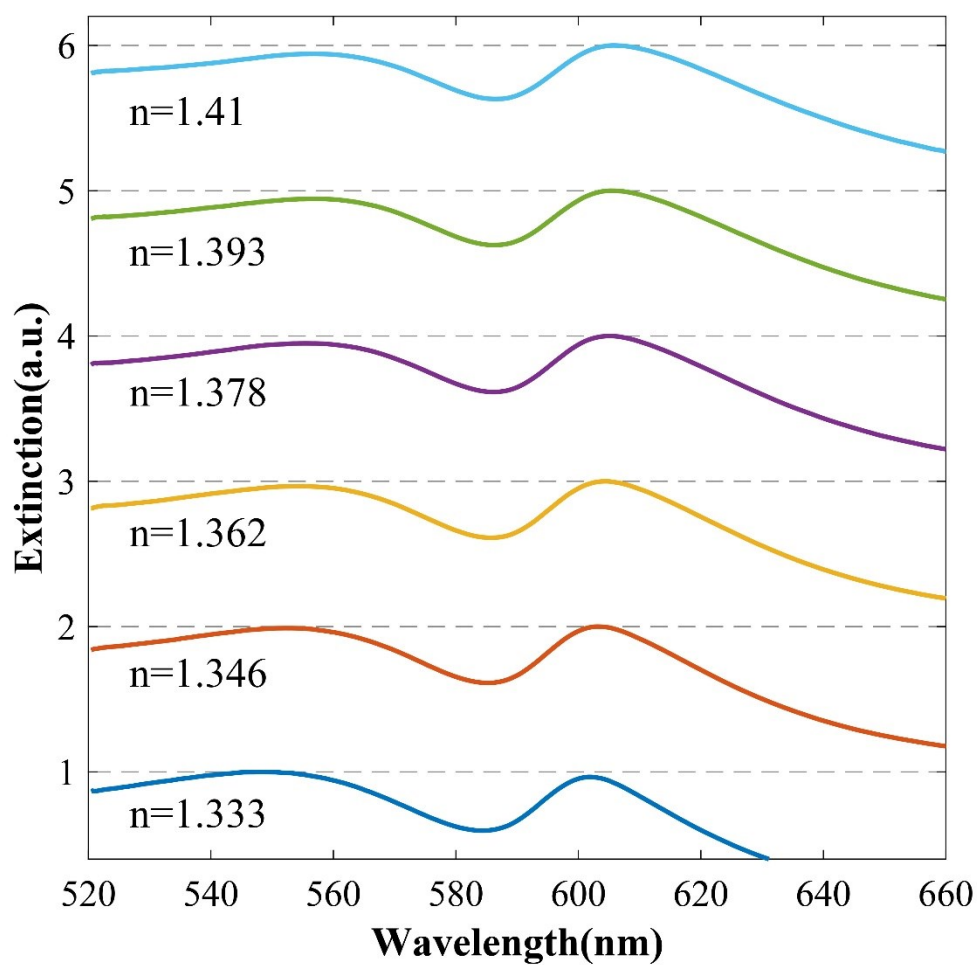

**Figure S3.** A set of extinction spectra of nanorods@J-aggregates with increasing solvent refractive index. The gray dashed lined are guide to compare the intensity viriation of the hybrid polariton states.

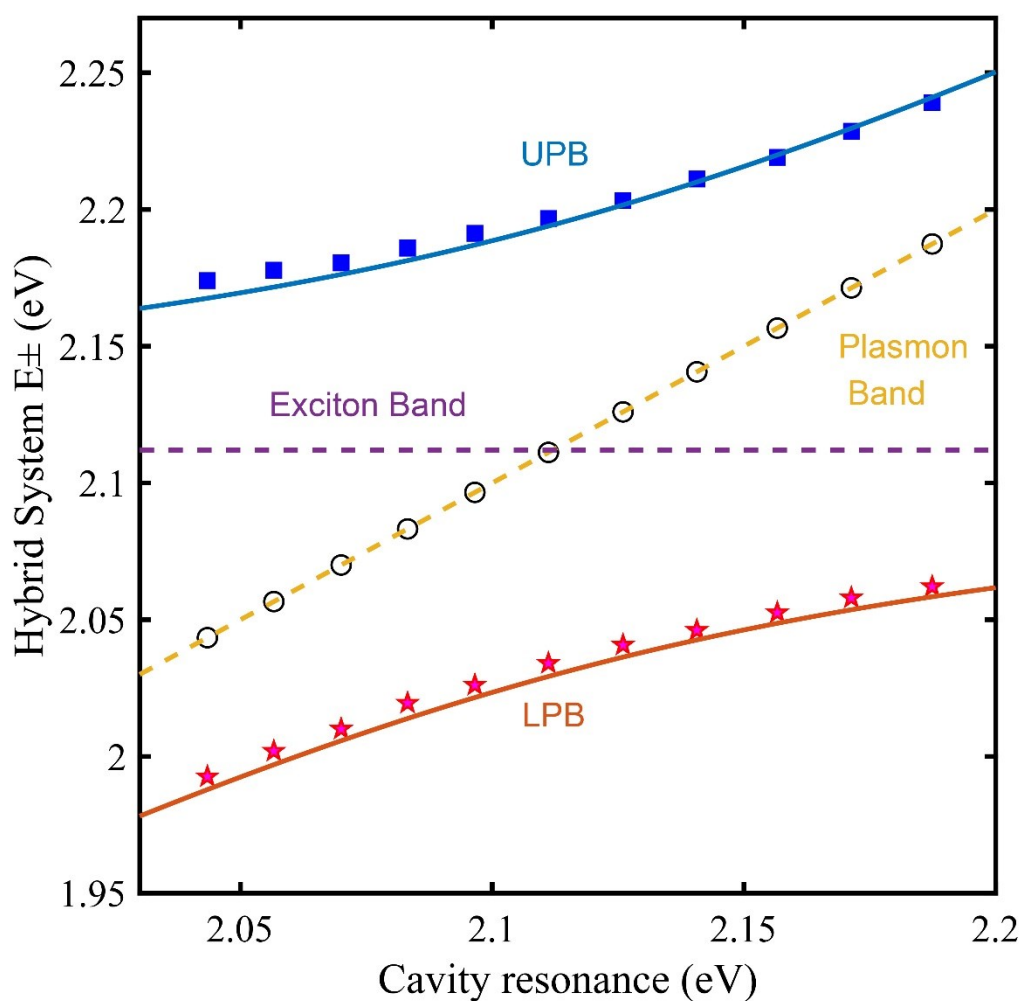

**Figure S4.** Corrected dispersion of the hybrid polariton states. The simulated result fits well with the coupled oscillator model after considering the dielectric coating layer.

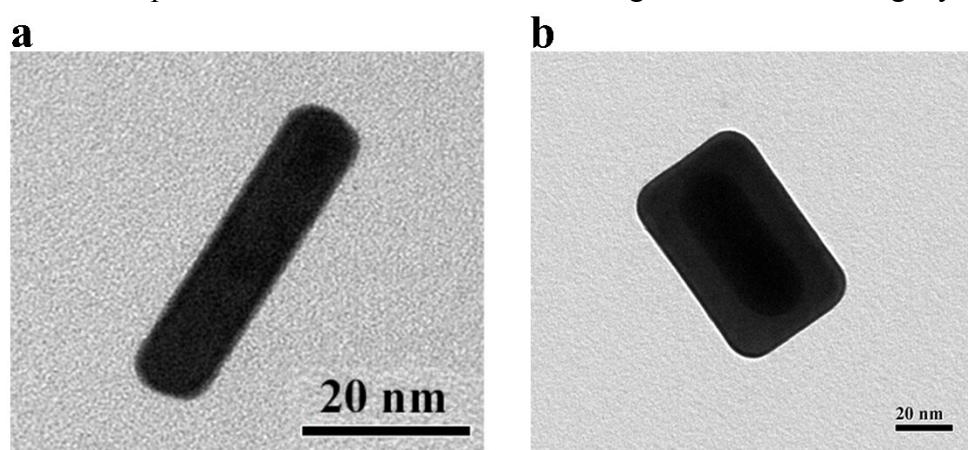

**Figure S5.** The curvature of the edge of Au@Ag nanorods with different Ag shell thickness. **a.** Capsule nanorod (the Ag shell is  $\sim 3$  nm). **b.** Quadrature Au@Ag nanorod (Ag shell thickness:  $\sim 8$  nm in the axial direction,  $\sim 15$  nm in the radial direction)

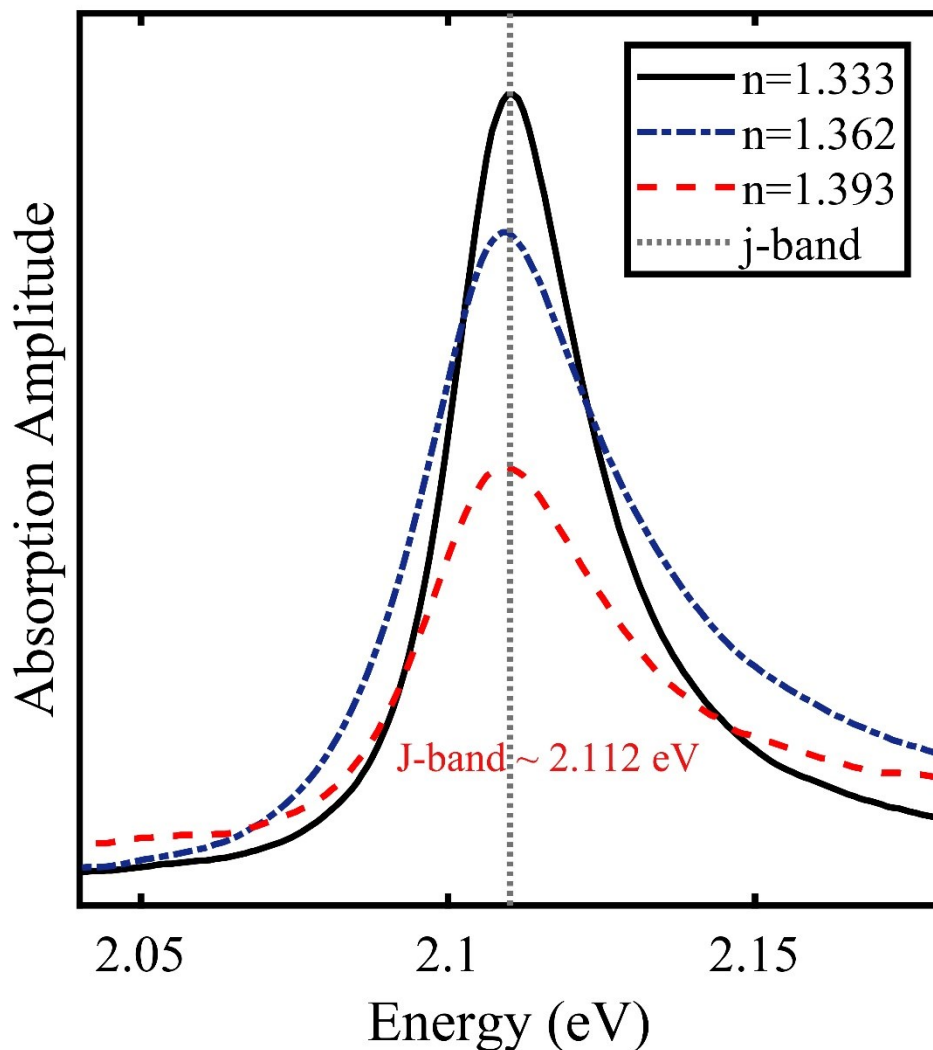

**Figure S6.** The variation of the J-aggregates' absorption peak amplitude in different solvent environments.

**Synthesis Au@Ag nanorods coating with J-aggregates.** The as-prepared Au@Ag nanoparticles were centrifuged (6000 rpm/min, 10min) and redispersed in deionized water. The extinction of the Au@Ag nanoparticles were controlled at the same strength. After that, 3  $\mu$ M TDBC dye molecules were added into 1 ml Au@Ag nanoparticles solution and shaken gently. 5 minutes later, Au@Ag nanoparticles were coating with J-aggregates layer. By changing the volume of TDBC, we can control the number of J-aggregates on the Au@Ag nanoparticles. The thickness of J-aggregates is about 1 nm.

**Optical characterization.** The extinction spectrums were measured by a J-1500 Circular Dichroism Spectrometer (JASCO, Japan) in a cuvette with 10mm light path. The TEM images were taken by a JEM-2100F TEM machine (JEOL Inc., Japan).
